# Supplementary material for: Impact of demographic and clinical factors on elagolix plus add-back therapy effects on patient-reported nonbleeding symptoms in women with heavy menstrual bleeding and uterine fibroids: a post hoc analysis of data from two clinical trials
Source: PubMed Central journal article supplement — F S Rep. 2024 Jun 14;5(3):285–95. doi: 10.1016/j.xfre.2024.06.002 (PMC11456625; doi:10.1016/j.xfre.2024.06.002), 2024-06-14
Supplement: mmc1.pdf [file mmc1.pdf]

## SUPPLEMENTAL MATERIALS

### **Impact of demographic and clinical factors on elagolix plus add-back therapy effects on patient-reported nonbleeding symptoms in women with heavy menstrual bleeding and uterine fibroids: a post hoc analysis of data from two clinical trials**

James A. Simon, M.D.,<sup>a</sup> Elizabeth A. Stewart, M.D.,<sup>b</sup> Susan Jewell, Ph.D.,<sup>c</sup> Moming Li, Ph.D.<sup>c</sup>, and Michael C. Snabes, M.D., Ph.D.<sup>c</sup>

<sup>a</sup> IntimMedicine Specialists, Department of Obstetrics and Gynecology, George Washington University School of Medicine, Washington, DC; <sup>b</sup> Division of Reproductive Endocrinology, Department of Obstetrics and Gynecology and Surgery, Mayo Clinic and Mayo Clinic Alix School of Medicine, Rochester, Minnesota; <sup>c</sup> AbbVie Inc., North Chicago, Illinois

#### **Corresponding Author:**

Michael C. Snabes, M.D., Ph.D.

AbbVie Inc.

1 North Waukegan Road, AP31-01F4A

North Chicago, Illinois 60064

E-mail: [michael.snabes@abbvie.com](mailto:michael.snabes@abbvie.com)

Phone: (847) 226-8710

**SUPPLEMENTAL TABLE 1**

Meaningful improvement<sup>a</sup> at month 1 in nonbleeding symptoms and menstrual bleeding across different patient subpopulations as evaluated using the Patient Global Impression of Change scale

| Subpopulation <sup>b</sup> | Treatment | Patients with meaningful improvement <sup>a</sup> , n/N (%) |                                  |                                  |                                 |                                  |                                  |
|----------------------------|-----------|-------------------------------------------------------------|----------------------------------|----------------------------------|---------------------------------|----------------------------------|----------------------------------|
|                            |           | Abdominal or pelvic pain                                    | Abdominal or pelvic pressure     | Abdominal or pelvic cramping     | Back pain                       | Abdominal bloating               | Menstrual bleeding               |
| Overall                    |           |                                                             |                                  |                                  |                                 |                                  |                                  |
|                            | ELA+AB    | 153/373<br>(41.0) <sup>***</sup>                            | 142/373<br>(38.1) <sup>***</sup> | 151/372<br>(40.6) <sup>***</sup> | 98/373<br>(26.3) <sup>***</sup> | 104/373<br>(27.9) <sup>***</sup> | 186/374<br>(49.7) <sup>***</sup> |
|                            | Placebo   | 25/187<br>(13.4)                                            | 24/187<br>(12.8)                 | 26/187<br>(13.9)                 | 19/187<br>(10.2)                | 23/187<br>(12.3)                 | 25/188<br>(13.3)                 |
| BMI, kg/m <sup>2</sup>     |           |                                                             |                                  |                                  |                                 |                                  |                                  |
| < 30                       | ELA+AB    | 42/125<br>(33.6) <sup>*</sup>                               | 36/125<br>(28.8) <sup>**</sup>   | 42/124<br>(33.9) <sup>***</sup>  | 26/125<br>(20.8)                | 34/125<br>(27.2)                 | 58/124<br>(46.8) <sup>***</sup>  |
|                            | Placebo   | 7/59<br>(11.9)                                              | 5/59<br>(8.5)                    | 6/59<br>(10.2)                   | 5/59<br>(8.5)                   | 9/59<br>(15.3)                   | 6/60<br>(10.0)                   |
| 30 to < 35                 | ELA+AB    | 43/106<br>(40.6) <sup>***</sup>                             | 38/106<br>(35.8) <sup>**</sup>   | 40/106<br>(37.7) <sup>**</sup>   | 26/106<br>(24.5) <sup>*</sup>   | 31/106<br>(29.2) <sup>*</sup>    | 55/108<br>(50.9) <sup>***</sup>  |
|                            | Placebo   | 7/50<br>(14.0)                                              | 6/50<br>(12.0)                   | 7/50<br>(14.0)                   | 4/50<br>(8.0)                   | 6/50<br>(12.0)                   | 8/50<br>(16.0)                   |
| ≥ 35                       | ELA+AB    | 68/141<br>(48.2) <sup>***</sup>                             | 68/141<br>(48.2) <sup>***</sup>  | 69/141<br>(48.9) <sup>***</sup>  | 46/141<br>(32.6) <sup>*</sup>   | 39/141<br>(27.7) <sup>**</sup>   | 73/141<br>(51.8) <sup>***</sup>  |

|                                     |         |                     |                     |                     |                    |                    |                     |
|-------------------------------------|---------|---------------------|---------------------|---------------------|--------------------|--------------------|---------------------|
|                                     | Placebo | 11/78<br>(14.1)     | 13/78<br>(16.7)     | 13/78<br>(16.7)     | 10/78<br>(12.8)    | 8/78<br>(10.3)     | 11/78<br>(14.1)     |
| Primary FIGO fibroid classification |         |                     |                     |                     |                    |                    |                     |
| 0–3                                 | ELA+AB  | 33/75<br>(44.0)**   | 27/75<br>(36.0)**   | 32/75<br>(42.7)***  | 19/75<br>(25.3)*   | 24/75<br>(32.0)*   | 39/75<br>(52.0)***  |
|                                     | Placebo | 5/35<br>(14.3)      | 3/35<br>(8.6)       | 2/35<br>(5.7)       | 2/35<br>(5.7)      | 4/35<br>(11.4)     | 3/35<br>(8.6)       |
| 4                                   | ELA+AB  | 70/177<br>(39.5)*** | 68/177<br>(38.4)*** | 71/176<br>(40.3)*** | 49/177<br>(27.7)** | 49/177<br>(27.7)*  | 87/178<br>(48.9)*** |
|                                     | Placebo | 13/91<br>(14.3)     | 13/91<br>(14.3)     | 15/91<br>(16.5)     | 11/91<br>(12.1)    | 13/91<br>(14.3)    | 17/92<br>(18.5)     |
| 5–8                                 | ELA+AB  | 47/115<br>(40.9)*** | 44/115<br>(38.3)*** | 46/115<br>(40.0)*** | 30/115<br>(26.1)** | 30/115<br>(26.1)** | 58/115<br>(50.4)*** |
|                                     | Placebo | 5/57<br>(8.8)       | 7/57<br>(12.3)      | 8/57<br>(14.0)      | 5/57<br>(8.8)      | 4/57<br>(7.0)      | 5/57<br>(8.8)       |

ELA + AB = elagolix plus add-back therapy (estradiol 1 mg and norethindrone acetate 0.5 mg); BMI = body mass index; FIGO = International Federation of Gynecology and Obstetrics; PGIC = Patient Global Impression of Change.

\* $P < .05$ ; \*\* $P < .01$ ; \*\*\* $P < .001$ .  $P$  values were descriptive only and no adjustments were made for multiplicity.

<sup>a</sup>Meaningful improvement defined by PGIC responses of “very much improved” or “much improved.”

<sup>b</sup>Subpopulations based on baseline demographic or clinical characteristics.

**SUPPLEMENTAL TABLE 2**

Meaningful improvement<sup>a</sup> at month 3 in nonbleeding symptoms and menstrual bleeding across different patient subpopulations as evaluated using the Patient Global Impression of Change scale

| Subpopulation <sup>b</sup> | Treatment | Patients with meaningful improvement <sup>a</sup> , n/N (%) |                                  |                                  |                                  |                                  |                                  |
|----------------------------|-----------|-------------------------------------------------------------|----------------------------------|----------------------------------|----------------------------------|----------------------------------|----------------------------------|
|                            |           | Abdominal or pelvic pain                                    | Abdominal or pelvic pressure     | Abdominal or pelvic cramping     | Back pain                        | Abdominal bloating               | Menstrual bleeding               |
| Overall                    | ELA+AB    | 236/342<br>(69.0) <sup>***</sup>                            | 239/342<br>(69.9) <sup>***</sup> | 237/342<br>(69.3) <sup>***</sup> | 182/342<br>(53.2) <sup>***</sup> | 172/341<br>(50.4) <sup>***</sup> | 286/340<br>(84.1) <sup>***</sup> |
|                            | Placebo   | 28/168<br>(16.7)                                            | 32/168<br>(19.0)                 | 32/168<br>(19.0)                 | 27/168<br>(16.1)                 | 22/168<br>(13.1)                 | 39/169<br>(23.1)                 |
| BMI, kg/m <sup>2</sup>     |           |                                                             |                                  |                                  |                                  |                                  |                                  |
| < 30                       | ELA+AB    | 75/114<br>(65.8) <sup>***</sup>                             | 75/114<br>(65.8) <sup>***</sup>  | 77/114<br>(67.5) <sup>***</sup>  | 63/114<br>(55.3) <sup>***</sup>  | 58/114<br>(50.9) <sup>***</sup>  | 93/113<br>(82.3) <sup>***</sup>  |
|                            | Placebo   | 12/57<br>(21.1)                                             | 13/57<br>(22.8)                  | 14/57<br>(24.6)                  | 11/57<br>(19.3)                  | 10/57<br>(17.5)                  | 16/58<br>(27.6)                  |
| 30 to < 35                 | ELA+AB    | 66/96<br>(68.8) <sup>***</sup>                              | 65/96<br>(67.7) <sup>***</sup>   | 67/96<br>(69.8) <sup>***</sup>   | 52/96<br>(54.2) <sup>***</sup>   | 44/96<br>(45.8) <sup>***</sup>   | 83/96<br>(86.5) <sup>***</sup>   |
|                            | Placebo   | 5/41<br>(12.2)                                              | 6/41<br>(14.6)                   | 7/41<br>(17.1)                   | 5/41<br>(12.2)                   | 5/41<br>(12.2)                   | 9/41<br>(22.0)                   |
| ≥ 35                       | ELA+AB    | 94/131<br>(71.8) <sup>***</sup>                             | 98/131<br>(74.8) <sup>***</sup>  | 92/131<br>(70.2) <sup>***</sup>  | 67/131<br>(51.1) <sup>***</sup>  | 69/130<br>(53.1) <sup>***</sup>  | 109/130<br>(83.8) <sup>***</sup> |
|                            | Placebo   | 11/70<br>(15.7)                                             | 13/70<br>(18.6)                  | 11/70<br>(15.7)                  | 11/70<br>(15.7)                  | 7/70<br>(10.0)                   | 14/70<br>(20.0)                  |

## Primary FIGO fibroid classification

|     |         |                                  |                                  |                                  |                                 |                                 |                                  |
|-----|---------|----------------------------------|----------------------------------|----------------------------------|---------------------------------|---------------------------------|----------------------------------|
| 0–3 | ELA+AB  | 50/72<br>(69.4) <sup>***</sup>   | 53/72<br>(73.6) <sup>***</sup>   | 53/72<br>(73.6) <sup>***</sup>   | 35/72<br>(48.6) <sup>***</sup>  | 37/72<br>(51.4) <sup>***</sup>  | 61/72<br>(84.7) <sup>***</sup>   |
|     | Placebo | 2/31<br>(6.5)                    | 2/31<br>(6.5)                    | 1/31<br>(3.2)                    | 2/31<br>(6.5)                   | 2/31<br>(6.5)                   | 2/31<br>(6.5)                    |
| 4   | ELA+AB  | 111/163<br>(68.1) <sup>***</sup> | 113/163<br>(69.3) <sup>***</sup> | 112/163<br>(68.7) <sup>***</sup> | 92/163<br>(56.4) <sup>***</sup> | 82/162<br>(50.6) <sup>***</sup> | 134/161<br>(83.2) <sup>***</sup> |
|     | Placebo | 16/81<br>(19.8)                  | 19/81<br>(23.5)                  | 17/81<br>(21.0)                  | 12/81<br>(14.8)                 | 14/81<br>(17.3)                 | 22/82<br>(26.8)                  |
| 5–8 | ELA+AB  | 72/101<br>(71.3) <sup>***</sup>  | 71/101<br>(70.3) <sup>***</sup>  | 69/101<br>(68.3) <sup>***</sup>  | 54/101<br>(53.5) <sup>***</sup> | 51/101<br>(50.5) <sup>***</sup> | 88/101<br>(87.1) <sup>***</sup>  |
|     | Placebo | 9/52<br>(17.3)                   | 10/52<br>(19.2)                  | 13/52<br>(25.0)                  | 11/52<br>(21.2)                 | 5/52<br>(9.6)                   | 14/52<br>(26.9)                  |

ELA + AB, elagolix plus add-back therapy (estradiol 1 mg and norethindrone acetate 0.5 mg); BMI, body mass index; FIGO, International Federation of Gynecology and Obstetrics; PGIC = Patient Global Impression of Change.

<sup>\*\*</sup> $P < .01$ ; <sup>\*\*\*</sup> $P < .001$ .  $P$  values were descriptive only and no adjustments were made for multiplicity.

<sup>a</sup>Meaningful improvement defined by PGIC responses of “very much improved” or “much improved.”

<sup>b</sup>Subpopulations based on baseline demographic or clinical characteristics.

## SUPPLEMENTAL TABLE 3

Meaningful improvement<sup>a</sup> at months 1, 3, and 6 in nonbleeding symptoms and menstrual bleeding across the lowest and highest FIGO fibroid classification subpopulations as evaluated using the Patient Global Impression of Change scale

| Subpopulation <sup>b</sup>          | Treatment | Patients with meaningful improvement <sup>a</sup> , n/N (%) |                              |                              |                     |                     |                      |
|-------------------------------------|-----------|-------------------------------------------------------------|------------------------------|------------------------------|---------------------|---------------------|----------------------|
|                                     |           | Abdominal or pelvic pain                                    | Abdominal or pelvic pressure | Abdominal or pelvic cramping | Back pain           | Abdominal bloating  | Menstrual bleeding   |
| <b>Month 1</b>                      |           |                                                             |                              |                              |                     |                     |                      |
| Lowest FIGO fibroid classification  |           |                                                             |                              |                              |                     |                     |                      |
| 0–3                                 | ELA+AB    | 37/92<br>(40.2)*                                            | 31/92<br>(33.7)**            | 35/92<br>(38.0)***           | 20/92<br>(21.7)*    | 24/92<br>(26.1)     | 44/92<br>(47.8)***   |
|                                     | Placebo   | 6/42<br>(14.3)                                              | 4/42<br>(9.5)                | 3/42<br>(7.1)                | 3/42<br>(7.1)       | 5/42<br>(11.9)      | 5/42<br>(11.9)       |
| 4                                   | ELA+AB    | 81/209<br>(38.8)***                                         | 78/209<br>(37.3)***          | 83/208<br>(39.9)***          | 58/209<br>(27.8)*** | 60/209<br>(28.7)*** | 102/210<br>(48.6)*** |
|                                     | Placebo   | 14/104<br>(13.5)                                            | 14/104<br>(13.5)             | 17/104<br>(16.3)             | 12/104<br>(11.5)    | 12/104<br>(11.5)    | 17/105<br>(16.2)     |
| 5–8                                 | ELA+AB    | 32/66<br>(48.5)***                                          | 30/66<br>(45.5)**            | 31/66<br>(47.0)***           | 20/66<br>(30.3)*    | 19/66<br>(28.8)*    | 38/66<br>(57.6)***   |
|                                     | Placebo   | 3/37<br>(8.1)                                               | 5/37<br>(13.5)               | 5/37<br>(13.5)               | 3/37<br>(8.1)       | 4/37<br>(10.8)      | 3/37<br>(8.1)        |
| Highest FIGO fibroid classification |           |                                                             |                              |                              |                     |                     |                      |
| 0–3                                 | ELA+AB    | 21/45<br>(46.7)*                                            | 16/45<br>(35.6)*             | 20/45<br>(44.4)***           | 12/45<br>(26.7)*    | 12/45<br>(26.7)     | 24/45<br>(53.3)***   |

|     |         |                                 |                                 |                                 |                                |                                |                                 |
|-----|---------|---------------------------------|---------------------------------|---------------------------------|--------------------------------|--------------------------------|---------------------------------|
|     | Placebo | 4/22<br>(18.2)                  | 2/22<br>(9.1)                   | 1/22<br>(4.5)                   | 1/22<br>(4.5)                  | 2/22<br>(9.1)                  | 0/22<br>(0.0)                   |
| 4   | ELA+AB  | 64/162<br>(39.5) <sup>***</sup> | 60/162<br>(37.0) <sup>***</sup> | 63/161<br>(39.1) <sup>***</sup> | 44/162<br>(27.2) <sup>**</sup> | 46/162<br>(28.4) <sup>**</sup> | 79/163<br>(48.5) <sup>***</sup> |
|     | Placebo | 9/81<br>(11.1)                  | 12/81<br>(14.8)                 | 13/81<br>(16.0)                 | 9/81<br>(11.1)                 | 9/81<br>(11.1)                 | 12/81<br>(14.8)                 |
| 5-8 | ELA+AB  | 65/160<br>(40.6) <sup>***</sup> | 63/160<br>(39.4) <sup>***</sup> | 66/160<br>(41.3) <sup>***</sup> | 42/160<br>(26.3) <sup>**</sup> | 45/160<br>(28.1) <sup>**</sup> | 81/160<br>(50.6) <sup>***</sup> |
|     | Placebo | 10/80<br>(12.5)                 | 9/80<br>(11.3)                  | 11/80<br>(13.8)                 | 8/80<br>(10.0)                 | 10/80<br>(12.5)                | 13/81<br>(16.0)                 |

**Month 3**

## Lowest FIGO fibroid classification

|     |         |                                  |                                  |                                  |                                  |                                 |                                  |
|-----|---------|----------------------------------|----------------------------------|----------------------------------|----------------------------------|---------------------------------|----------------------------------|
| 0-3 | ELA+AB  | 58/86<br>(67.4) <sup>***</sup>   | 58/86<br>(67.4) <sup>***</sup>   | 60/86<br>(69.8) <sup>***</sup>   | 41/86<br>(47.7) <sup>***</sup>   | 40/86<br>(46.5) <sup>***</sup>  | 72/86<br>(83.7) <sup>***</sup>   |
|     | Placebo | 2/36<br>(5.6)                    | 2/36<br>(5.6)                    | 1/36<br>(2.8)                    | 2/36<br>(5.6)                    | 2/36<br>(5.6)                   | 3/36<br>(8.3)                    |
| 4   | ELA+AB  | 128/189<br>(67.7) <sup>***</sup> | 131/189<br>(69.3) <sup>***</sup> | 130/189<br>(68.8) <sup>***</sup> | 103/189<br>(54.5) <sup>***</sup> | 96/188<br>(51.1) <sup>***</sup> | 157/187<br>(84.0) <sup>***</sup> |
|     | Placebo | 17/93<br>(18.3)                  | 21/93<br>(22.6)                  | 21/93<br>(22.6)                  | 15/93<br>(16.1)                  | 14/93<br>(15.1)                 | 25/94<br>(26.6)                  |
| 5-8 | ELA+AB  | 47/61<br>(77.0) <sup>***</sup>   | 48/61<br>(78.7) <sup>***</sup>   | 44/61<br>(72.1) <sup>***</sup>   | 37/61<br>(60.7) <sup>***</sup>   | 34/61<br>(55.7) <sup>***</sup>  | 54/61<br>(88.5) <sup>***</sup>   |
|     | Placebo | 8/35<br>(22.9)                   | 8/35<br>(22.9)                   | 9/35<br>(25.7)                   | 8/35<br>(22.9)                   | 5/35<br>(14.3)                  | 10/35<br>(28.6)                  |

## Highest FIGO fibroid classification

|     |         |                      |                      |                      |                     |                     |                      |
|-----|---------|----------------------|----------------------|----------------------|---------------------|---------------------|----------------------|
| 0-3 | ELA+AB  | 29/44<br>(65.9)***   | 31/44<br>(70.5)***   | 31/44<br>(70.5)***   | 21/44<br>(47.7)**   | 24/44<br>(54.5)***  | 36/44<br>(81.8)***   |
|     | Placebo | 2/19<br>(10.5)       | 2/19<br>(10.5)       | 1/19<br>(5.3)        | 2/19<br>(10.5)      | 1/19<br>(5.3)       | 2/19<br>(10.5)       |
| 4   | ELA+AB  | 102/147<br>(69.4)*** | 105/147<br>(71.4)*** | 102/147<br>(69.4)*** | 78/147<br>(53.1)*** | 74/146<br>(50.7)*** | 120/145<br>(82.8)*** |
|     | Placebo | 12/73<br>(16.4)      | 15/73<br>(20.5)      | 13/73<br>(17.8)      | 8/73<br>(11.0)      | 10/73<br>(13.7)     | 16/73<br>(21.9)      |
| 5-8 | ELA+AB  | 102/145<br>(70.3)*** | 101/145<br>(69.7)*** | 101/145<br>(69.7)*** | 82/145<br>(56.6)*** | 72/145<br>(49.7)*** | 127/145<br>(87.6)*** |
|     | Placebo | 13/72<br>(18.1)      | 14/72<br>(19.4)      | 17/72<br>(23.6)      | 15/72<br>(20.8)     | 10/72<br>(13.9)     | 20/73<br>(27.4)      |

### Month 6

#### Lowest FIGO fibroid classification

|     |         |                      |                      |                      |                      |                     |                      |
|-----|---------|----------------------|----------------------|----------------------|----------------------|---------------------|----------------------|
| 0-3 | ELA+AB  | 53/79<br>(67.1)***   | 55/79<br>(69.6)***   | 52/79<br>(65.8)***   | 37/79<br>(46.8)***   | 46/79<br>(58.2)***  | 66/79<br>(83.5)***   |
|     | Placebo | 2/32<br>(6.3)        | 2/32<br>(6.3)        | 3/32<br>(9.4)        | 3/32<br>(9.4)        | 2/32<br>(6.3)       | 3/32<br>(9.4)        |
| 4   | ELA+AB  | 118/163<br>(72.4)*** | 109/163<br>(66.9)*** | 120/163<br>(73.6)*** | 101/163<br>(62.0)*** | 95/163<br>(58.3)*** | 145/164<br>(88.4)*** |
|     | Placebo | 23/83<br>(27.7)      | 17/83<br>(20.5)      | 26/83<br>(31.3)      | 21/83<br>(25.3)      | 16/83<br>(19.3)     | 22/83<br>(26.5)      |
| 5-8 | ELA+AB  | 48/57<br>(84.2)      | 45/57<br>(78.9)      | 47/57<br>(82.5)      | 35/57<br>(61.4)      | 32/57<br>(56.1)     | 51/57<br>(89.5)      |



|                                     |         |                                 |                                 |                                  |                                 |                                 |                                  |
|-------------------------------------|---------|---------------------------------|---------------------------------|----------------------------------|---------------------------------|---------------------------------|----------------------------------|
|                                     | Placebo | 6/34<br>(17.6) <sup>***</sup>   | 6/34<br>(17.6) <sup>***</sup>   | 7/34<br>(20.6) <sup>***</sup>    | 6/34<br>(17.6) <sup>***</sup>   | 4/34<br>(11.8) <sup>***</sup>   | 8/34<br>(23.5) <sup>***</sup>    |
| Highest FIGO fibroid classification |         |                                 |                                 |                                  |                                 |                                 |                                  |
| 0–3                                 | ELA+AB  | 27/39<br>(69.2) <sup>***</sup>  | 30/39<br>(76.9) <sup>***</sup>  | 27/39<br>(69.2) <sup>***</sup>   | 19/39<br>(48.7) <sup>**</sup>   | 25/39<br>(64.1) <sup>***</sup>  | 32/39<br>(82.1) <sup>***</sup>   |
|                                     | Placebo | 1/18<br>(5.6)                   | 1/18<br>(5.6)                   | 2/18<br>(11.1)                   | 2/18<br>(11.1)                  | 2/18<br>(11.1)                  | 2/18<br>(11.1)                   |
| 4                                   | ELA+AB  | 95/129<br>(73.6) <sup>***</sup> | 88/129<br>(68.2) <sup>***</sup> | 91/129<br>(70.5) <sup>***</sup>  | 77/129<br>(59.7) <sup>***</sup> | 75/129<br>(58.1) <sup>***</sup> | 112/130<br>(86.2) <sup>***</sup> |
|                                     | Placebo | 14/63<br>(22.2)                 | 13/63<br>(20.6)                 | 15/63<br>(23.8)                  | 12/63<br>(19.0)                 | 12/63<br>(19.0)                 | 12/63<br>(19.0)                  |
| 5–8                                 | ELA+AB  | 97/131<br>(74.0) <sup>***</sup> | 91/131<br>(69.5) <sup>***</sup> | 101/131<br>(77.1) <sup>***</sup> | 77/131<br>(58.8) <sup>***</sup> | 73/131<br>(55.7) <sup>***</sup> | 118/131<br>(90.1) <sup>***</sup> |
|                                     | Placebo | 16/68<br>(23.5)                 | 11/68<br>(16.2)                 | 19/68<br>(27.9)                  | 16/68<br>(23.5)                 | 8/68<br>(11.8)                  | 19/68<br>(27.9)                  |

ELA + AB = elagolix plus add-back therapy (estradiol 1 mg and norethindrone acetate 0.5 mg); FIGO = International Federation of Gynecology and Obstetrics; PGIC = Patient Global Impression of Change.

\* $P < .05$ ; \*\* $P < .01$ ; \*\*\* $P < .001$ .  $P$  values were descriptive only and no adjustments were made for multiplicity.

<sup>a</sup>Meaningful improvement defined by PGIC responses of “very much improved” or “much improved.”

<sup>b</sup>Subpopulations based on baseline demographic or clinical characteristics.

**SUPPLEMENTAL FIGURE 1**

Study design.

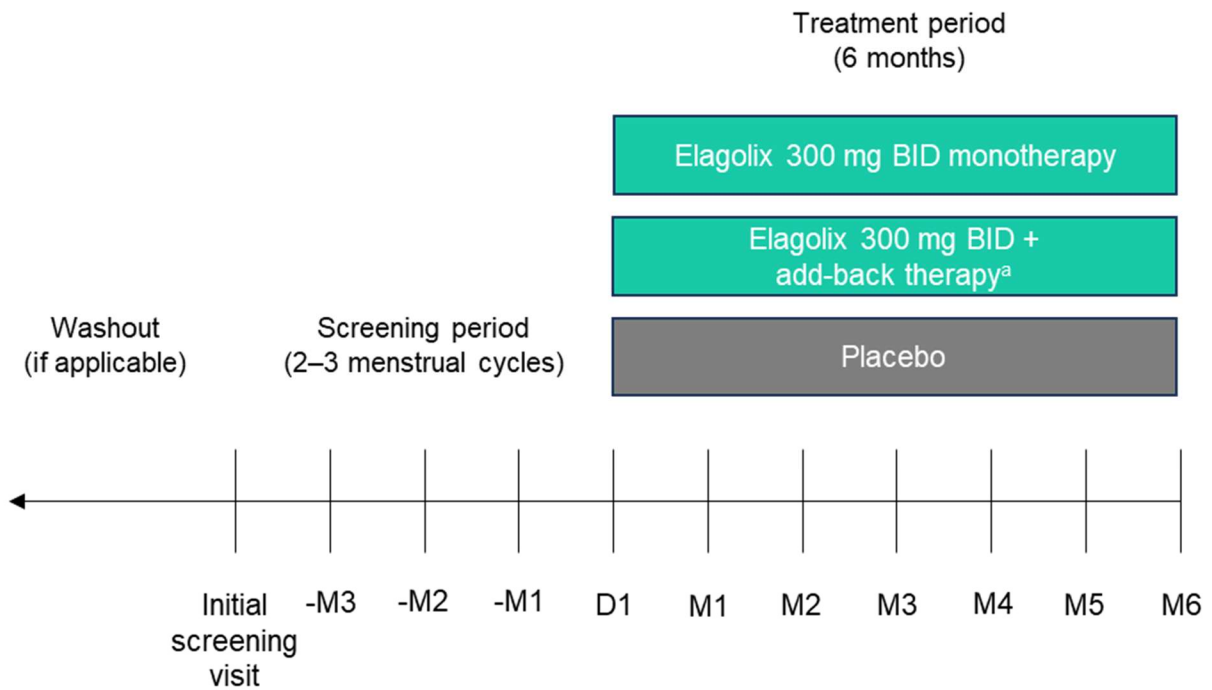

<sup>a</sup>Add-back therapy consisted of estradiol 1 mg and norethindrone acetate 0.5 mg.  
BID = twice a day; D = day; M = month.

## SUPPLEMENTAL FIGURE 2

CONSORT diagram describing study pooling and post hoc analysis in relation to original studies.

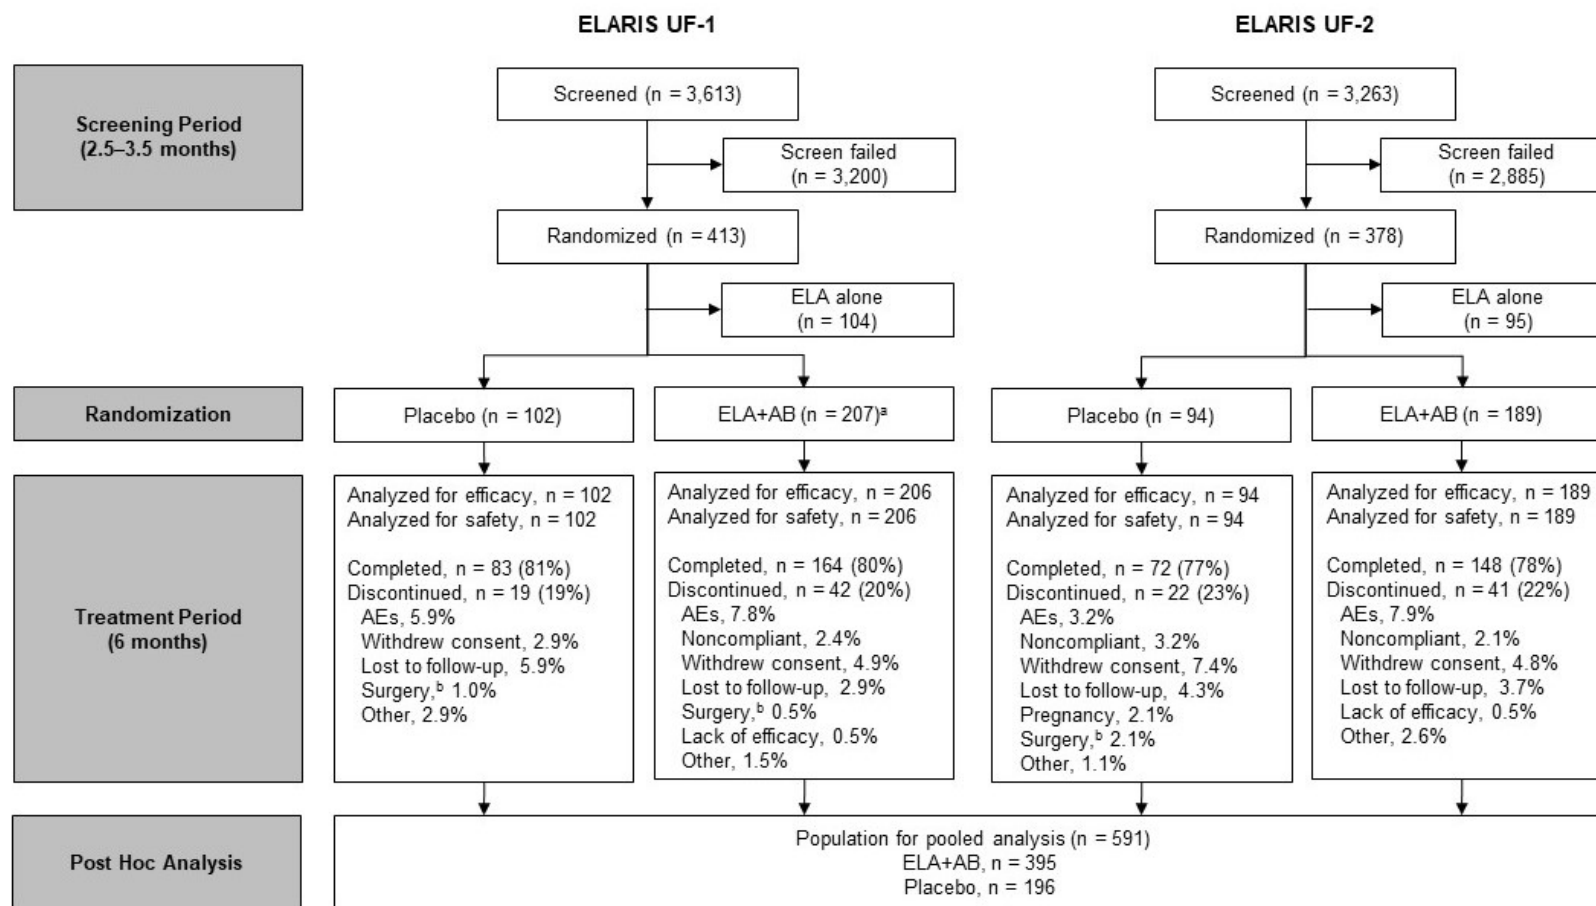

<sup>a</sup>One woman in ELARIS UF-1 was randomized but not treated.

<sup>b</sup>Women require surgery or invasive intervention for treatment of uterine fibroids.

AEs = adverse events; ELA = elagolix; ELA + AB = elagolix plus add-back therapy (estradiol 1 mg and norethindrone acetate 0.5 mg).

**SUPPLEMENTAL FIGURE 3**

Meaningful improvements<sup>a</sup> in nonbleeding symptoms and menstrual bleeding across age groups as evaluated using the Patient Global Impression of Change scale at month 3.

Abdominal or pelvic pain **(A)**, abdominal or pelvic pressure **(B)**, abdominal or pelvic cramping **(C)**, back pain **(D)**, abdominal bloating **(E)**, menstrual bleeding **(F)**.

**(A)**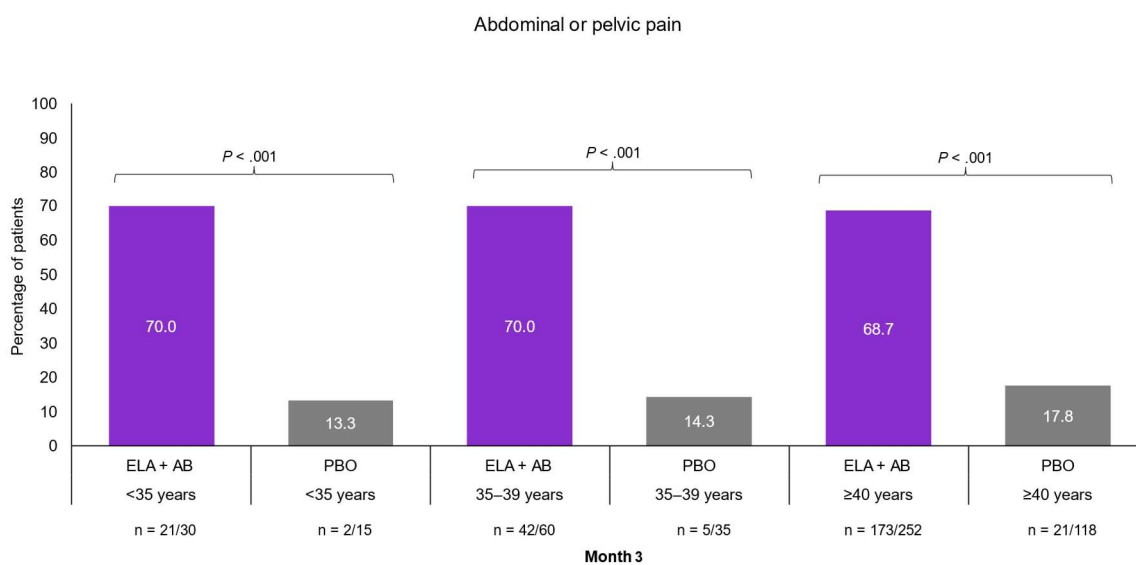

(B)

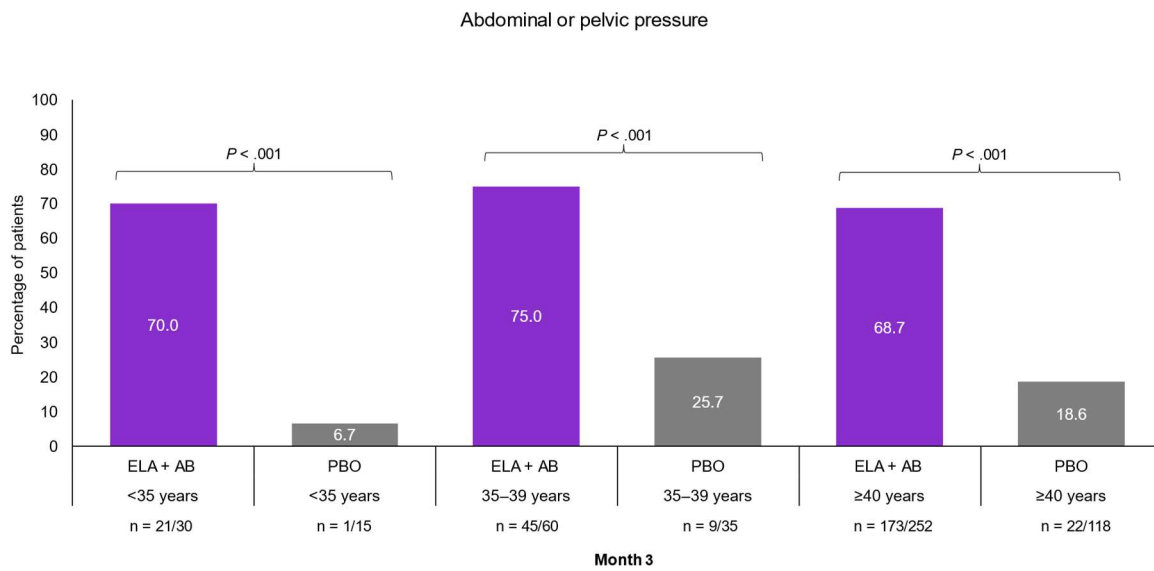

(C)

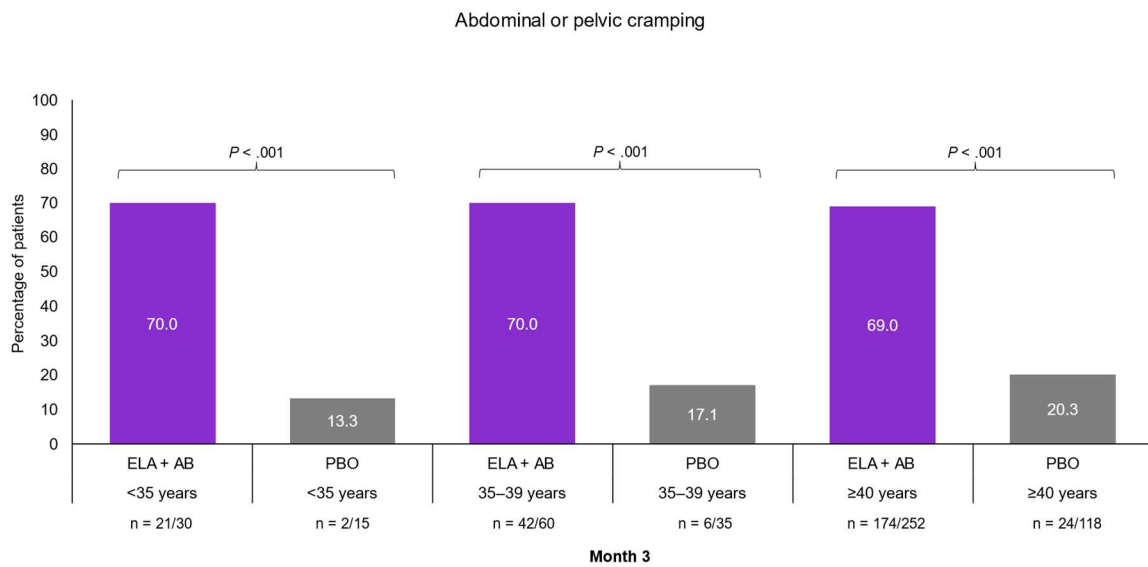

(D)

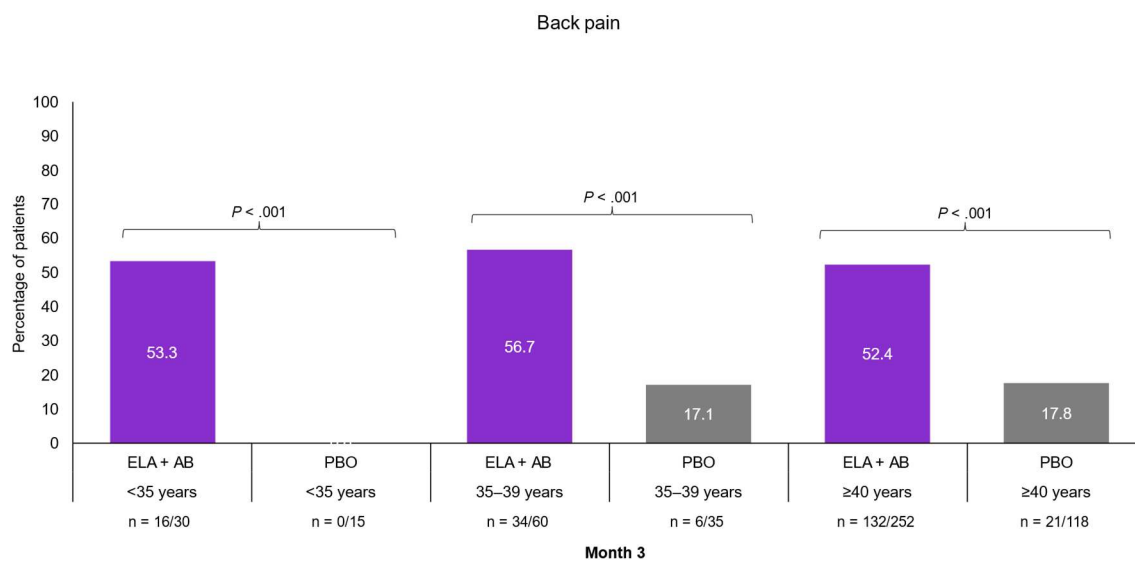

(E)

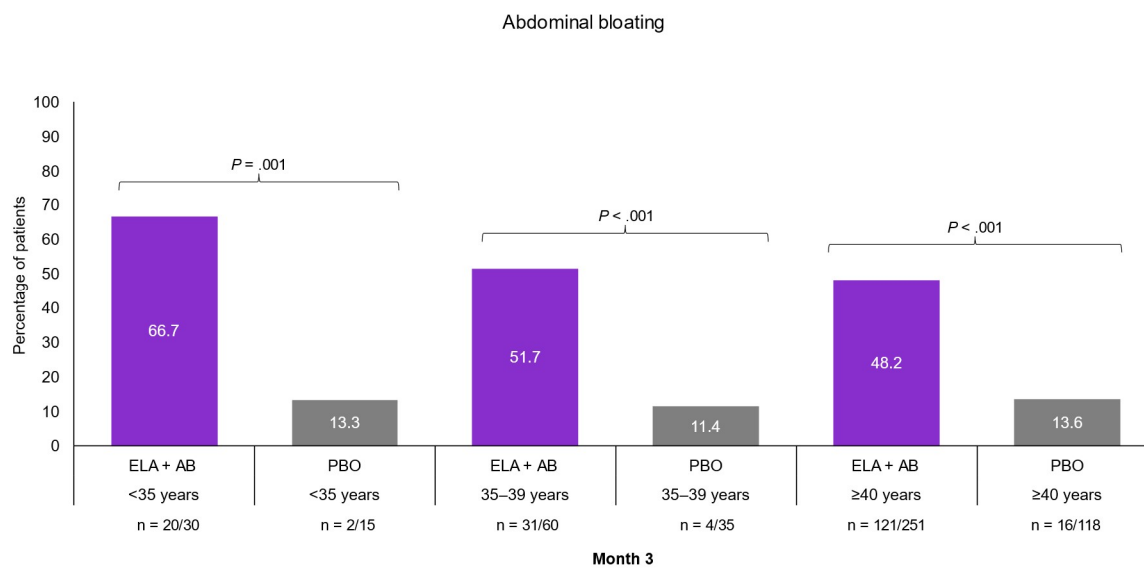

(F)

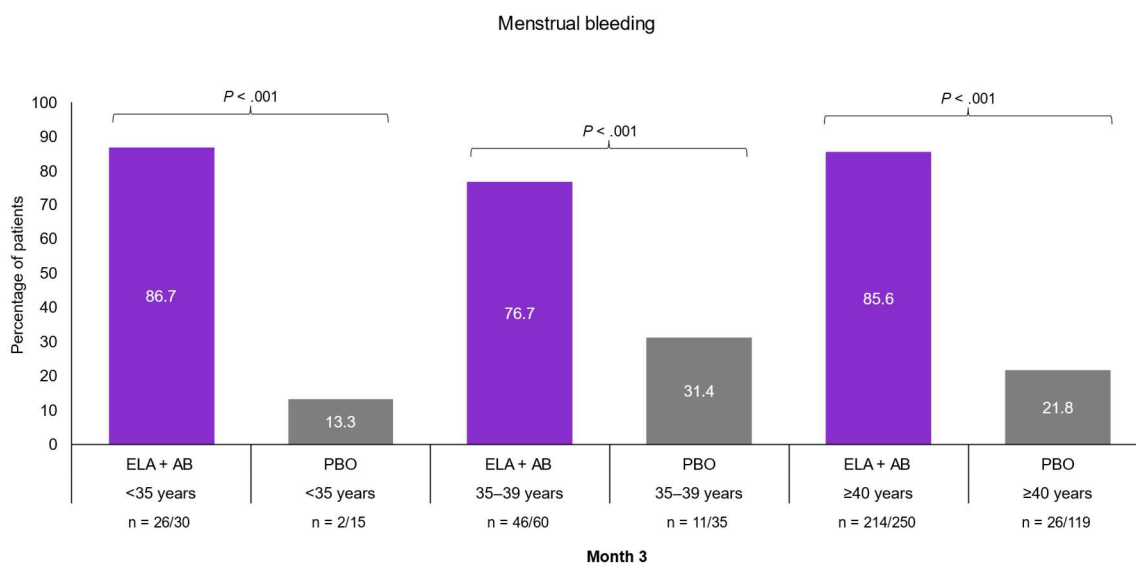

<sup>a</sup>Meaningful improvement defined by PGIC responses of “very much improved” or “much improved.”

*P* values were descriptive only and no adjustments were made for multiplicity.

ELA + AB = elagolix plus add-back therapy (estradiol 1 mg and norethindrone acetate 0.5 mg); PBO = placebo; PGIC = Patient Global Impression of Change.

**SUPPLEMENTAL FIGURE 4**

Meaningful improvements<sup>a</sup> in nonbleeding symptoms and menstrual bleeding by race,<sup>b</sup> evaluated using the Patient Global Impression of Change scale at month 3. Abdominal or pelvic pain **(A)**, abdominal or pelvic pressure **(B)**, abdominal or pelvic cramping **(C)**, back pain **(D)**, abdominal bloating **(E)**, menstrual bleeding **(F)**.

**(A)**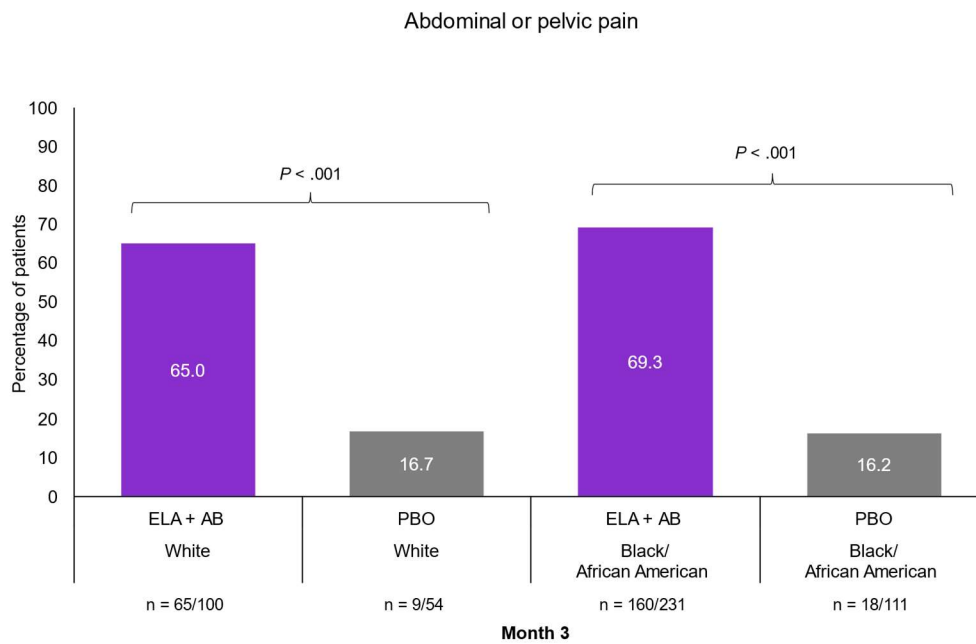**(B)**



## Abdominal or pelvic pressure

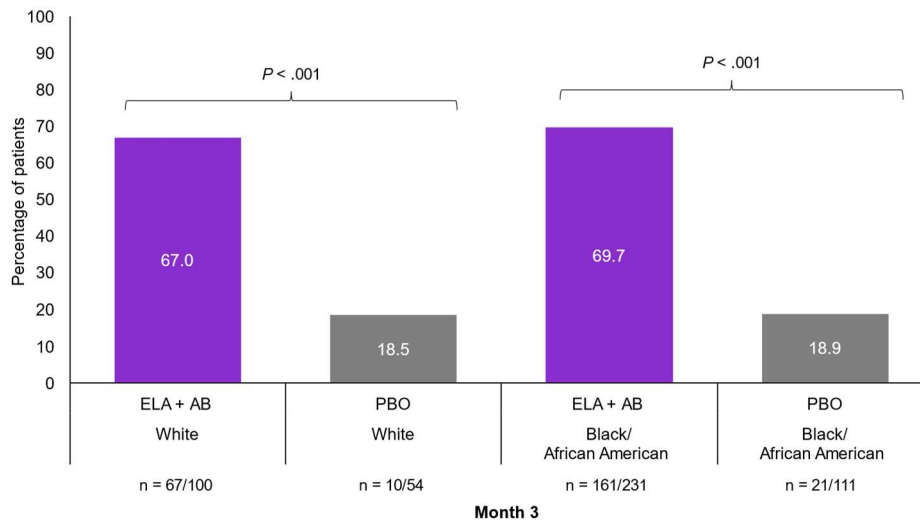

(C)

## Abdominal or pelvic cramping

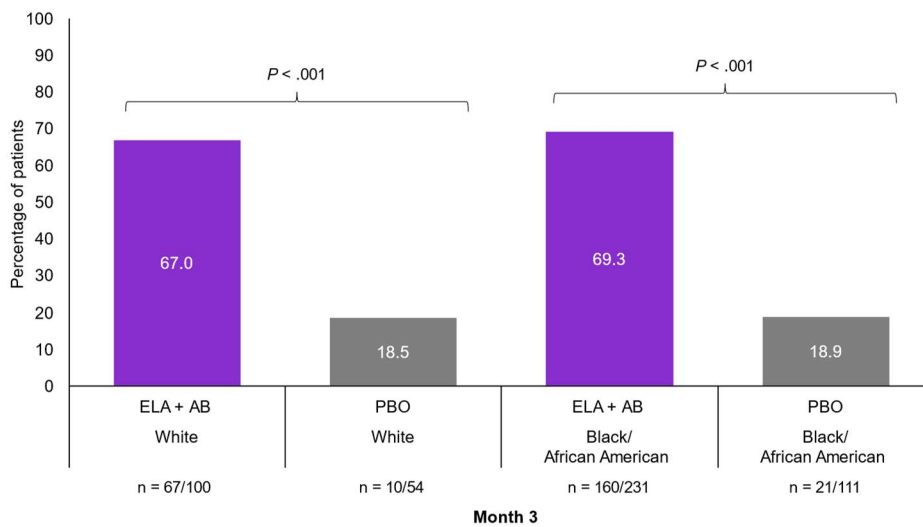

(D)

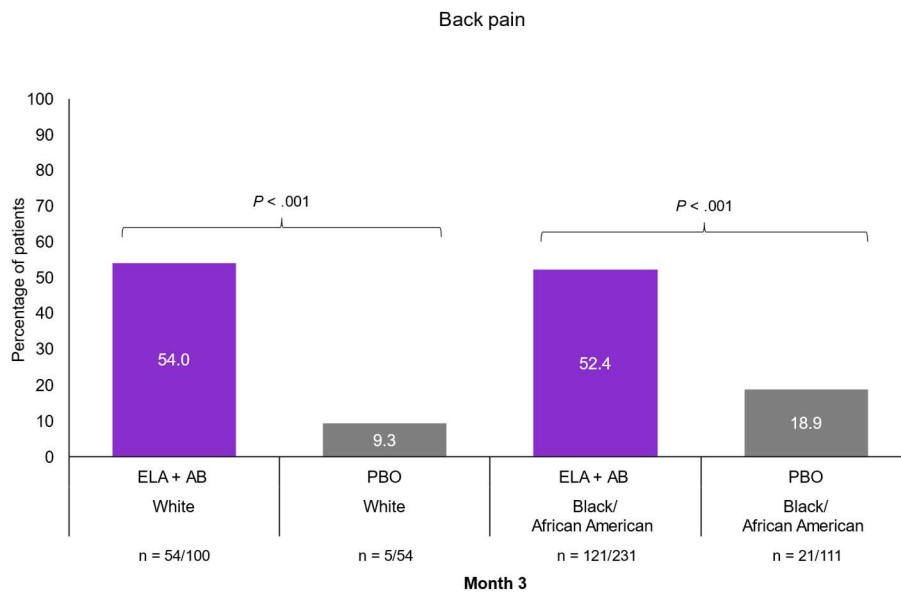

(E)

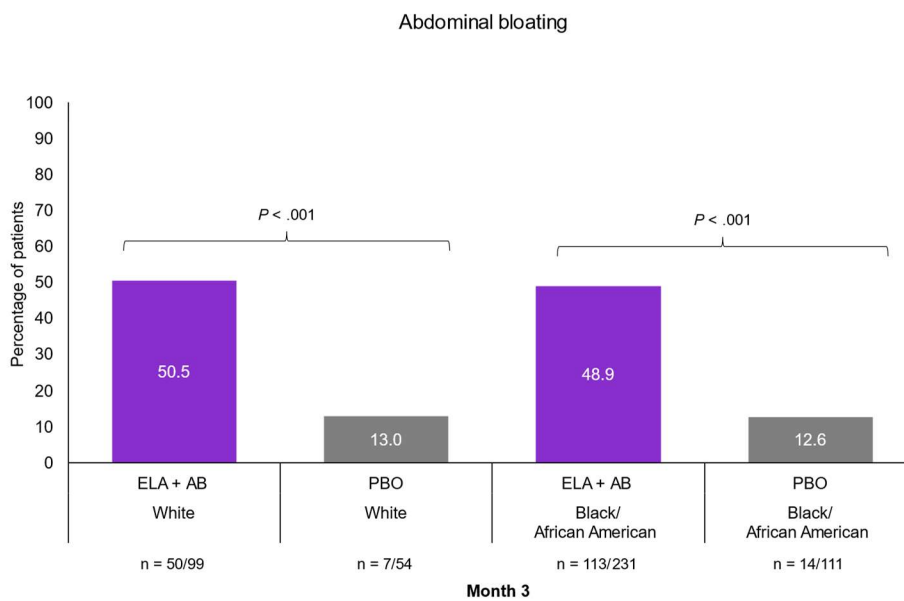

(F)

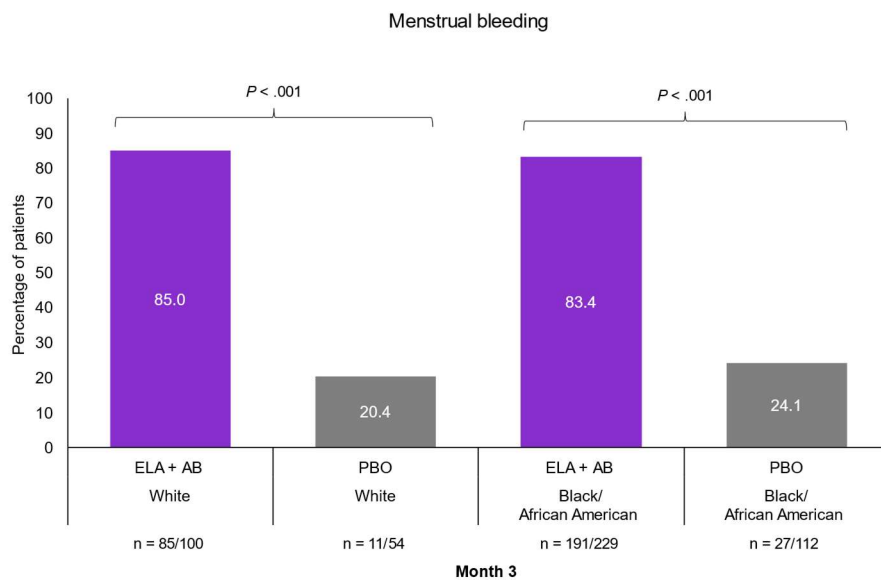

<sup>a</sup>Meaningful improvement defined by PGIC responses of “very much improved” or “much improved.”

<sup>b</sup>Only White and Black/African American races were included in this analysis due to small patient numbers of other races.

*P* values were descriptive only and no adjustments were made for multiplicity.

ELA + AB = elagolix plus add-back therapy (estradiol 1 mg and norethindrone acetate 0.5 mg); PBO = placebo; PGIC = Patient Global Impression of Change.
